# Supplementary material for: Cervical Microbiota Associated with Higher Grade Cervical Intraepithelial Neoplasia in Women Infected with High-Risk Human Papillomaviruses
Source: Oxford University Press journal article supplement (doi:10.1158/1940-6207.capr-15-0350), 2016-03-02
Supplement: 19406207capr150350-sup-155934_2_supp_3351274_b2cb3n.docx [file 19406207capr150350-sup-155934_2_supp_3351274_b2cb3n.docx]

**Supplemental Figure 1.** A) Non-metric dimensional scaling of the Bray-Curtis metric according to CIN status (ADONIS *p*=0.30; stress=0.09). **Supplemental Figure 1.** B) Non-metric dimensional scaling of the Bray-Curtis metric according to 8-OH status (ADONIS *p*=0.27; stress=0.10).

**Supplemental Figure 2**. A) LEfSe comparing differentially abundant taxa according to 8-OH status. OTU classifications: Burkholderiales; unclassified (OTU_2630146), Oxalobacteraceae; unclassified (OTU_245882), *Agrobacterium*; unclassified (OTU_409128), *Limnohabitans* (OTU_1515063), Comamonadaceae; unclassified (OTU_730399). B) LEfSe comparing differentially abundant imputed KEGG pathways according to 8-OH status.
